# Supplementary material for: A Pilot Study of Clinicians' Perceptions of Feasibility, Client-Centeredness, and Usability of the Systematic Tailored Assessment for Responding to Suicidality Protocol
Source: Atypon-hosted journal article supplement (doi:10.1027/0227-5910/a000796), 2021-06-30

## Electronic Supplementary Material 1

Figure S1. STARS Protocol Approach: Sections and Items

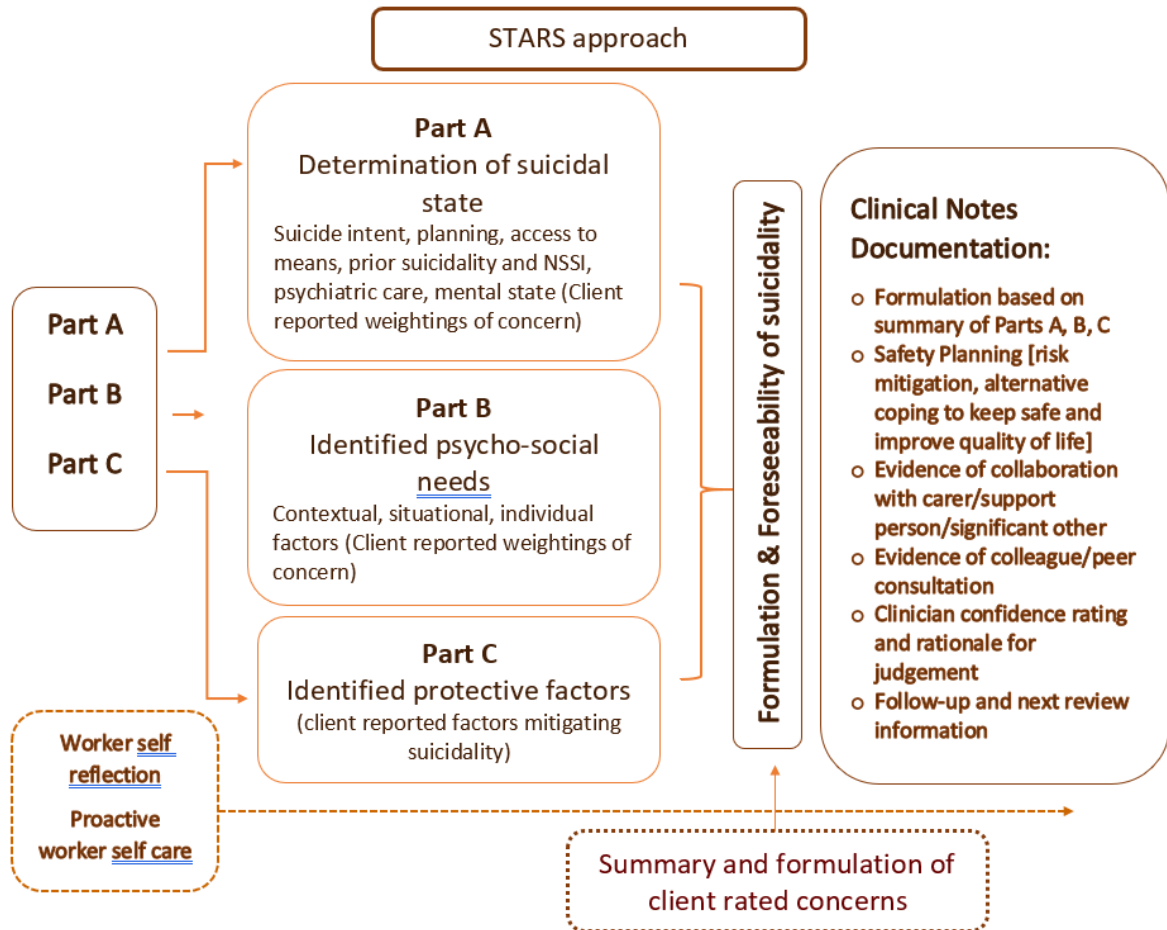

Supplement: 0227-5910_a000796_esm1.pdf [file 0227-5910_a000796_esm1.pdf]
