# Supplementary material for: A Pilot Study of Clinicians' Perceptions of Feasibility, Client-Centeredness, and Usability of the Systematic Tailored Assessment for Responding to Suicidality Protocol
Source: Atypon-hosted journal article supplement (doi:10.1027/0227-5910/a000796), 2021-06-30
Supplement: 0227-5910_a000796_esm2.pdf [file 0227-5910_a000796_esm2.pdf]

**Electronic Supplementary Material 2**

Table S1. *Demographic Characteristics of Clinicians who Commenced the Survey*

|                                     | Completed | Did not Complete | <i>n</i> |
|-------------------------------------|-----------|------------------|----------|
| Gender                              |           |                  |          |
| Male                                | 13        | 1                | 14       |
| Female                              | 29        | 8                | 37       |
|                                     | 42        | 9                |          |
| Age                                 |           |                  |          |
| <45years                            | 23        | 5                | 28       |
| ≥45years                            | 19        | 4                | 23       |
| Work Status                         |           |                  |          |
| Full time                           | 23        | 5                | 28       |
| Part time                           | 12        | 4                | 16       |
| Casual                              | 7         |                  | 7        |
| Worker Role <sup>a</sup>            |           |                  |          |
| Health Professional                 | 36        | 6                | 42       |
| Non-Health Professional             | 6         | 3                | 9        |
| Level of Education                  |           |                  |          |
| Undergraduate degree                | 5         | 2                | 7        |
| 4th Year degree                     | 9         | 1                | 10       |
| Masters degree                      | 24        | 6                | 30       |
| PhD                                 | 4         |                  | 4        |
| Years working with suicidal persons |           |                  |          |
| <7 years                            | 19        | 4                | 23       |
| ≥7years                             | 23        | 5                | 28       |
| Completed STARS Training            |           |                  |          |
| Yes                                 | 12        | 1                | 13       |
| No                                  | 30        | 8                | 38       |
| Recency of Training                 |           |                  |          |
| <12months                           | 26        | 3                | 29       |
| ≥12months                           | 16        | 6                | 22       |
| Recency of Supervision              |           |                  |          |
| <12months                           | 33        | 5                | 38       |
| ≥12months                           | 9         | 4                | 13       |

<sup>a</sup> Health professionals had qualifications in an allied health or health occupation (e.g., psychologists, social worker, nurse, doctor, occupational therapist), whereas non-health professionals had qualifications or experiences in community welfare, youth work, volunteer community work, or other human service roles.
