# Supplementary material for: A Pilot Study of Clinicians' Perceptions of Feasibility, Client-Centeredness, and Usability of the Systematic Tailored Assessment for Responding to Suicidality Protocol
Source: Atypon-hosted journal article supplement (doi:10.1027/0227-5910/a000796), 2021-06-30
Supplement: 0227-5910_a000796_esm4.pdf [file 0227-5910_a000796_esm4.pdf]

**Electronic Supplementary Material 4**

Table S2. Distribution of Clinician Responses According to Demographic and Work Characteristics<sup>1</sup>

| Sample characteristic                           | Ease of administration |              | Client felt validated |              | Confidence for screening of suicidality |             | Confidence for informing priority areas |              | Client-centred approach |             | Effectiveness of STARS Part A |             | Effectiveness of STARS Part B |             | Effectiveness of STARS Part C |              |
|-------------------------------------------------|------------------------|--------------|-----------------------|--------------|-----------------------------------------|-------------|-----------------------------------------|--------------|-------------------------|-------------|-------------------------------|-------------|-------------------------------|-------------|-------------------------------|--------------|
|                                                 | Yes                    | No           | Yes                   | No           | Yes                                     | No          | Yes                                     | No           | Yes                     | No          | Yes                           | No          | Yes                           | No          | Yes                           | No           |
| <b>Gender</b>                                   |                        |              |                       |              |                                         |             |                                         |              |                         |             |                               |             |                               |             |                               |              |
| Female                                          | 13<br>(44.8)           | 16<br>(55.2) | 16<br>(57.1)          | 12<br>(42.9) | 24<br>(85.7)                            | 4<br>(14.3) | 20<br>(71.4)                            | 8<br>(28.6)  | 26<br>(92.9)            | 2<br>(7.1)  | 21<br>(80.8)                  | 5<br>(19.2) | 22<br>(81.5)                  | 5<br>(18.5) | 19<br>(70.4)                  | 8<br>(29.6)  |
| Male                                            | 4 (33.3)               | 8 (66.7)     | 5 (55.6)              | 4 (44.4)     | 9 (75)                                  | 3 (25)      | 9 (75)                                  | 3 (25)       | 10 (83.3)               | 2 (16.7)    | 11 (91.7)                     | 1 (8.3)     | 10 (90.9)                     | 1 (9.1)     | 7 (70)                        | 3 (30)       |
| <b>Age</b>                                      |                        |              |                       |              |                                         |             |                                         |              |                         |             |                               |             |                               |             |                               |              |
| < 45 years                                      | 7 (30.4)               | 16<br>(69.6) | 11 (50)               | 11 (50)      | 17<br>(77.3)                            | 5<br>(22.7) | 16<br>(72.7)                            | 6<br>(27.3)  | 20<br>(90.9)            | 2 (9.1)     | 18<br>(85.7)                  | 3<br>(14.3) | 19<br>(86.4)                  | 3<br>(13.6) | 16<br>(76.2)                  | 5<br>(23.8)  |
| ≥ 45+ years                                     | 10<br>(55.6)           | 8 (44.4)     | 10<br>(66.7)          | 5 (33.3)     | 16<br>(88.9)                            | 2<br>(11.1) | 13<br>(72.2)                            | 5<br>(27.8)  | 16<br>(88.9)            | 2<br>(11.1) | 14<br>(82.4)                  | 3<br>(17.6) | 13<br>(81.3)                  | 3<br>(18.7) | 10<br>(62.5)                  | 6<br>(37.5)  |
| <b>Worker Role</b>                              |                        |              |                       |              |                                         |             |                                         |              |                         |             |                               |             |                               |             |                               |              |
| Health Professional (HP)                        | 13<br>(37.1)           | 22<br>(62.9) | 15<br>(48.4)          | 16<br>(51.6) | 28<br>(80)                              | 7 (20)      | 25<br>(71.4)                            | 10<br>(28.6) | 31<br>(88.6)            | 4<br>(11.4) | 27<br>(81.8)                  | 7<br>(21.2) | 26<br>(81.3)                  | 6<br>(18.7) | 22<br>(68.7)                  | 10<br>(31.3) |
| Non-HP                                          | 4 (66.7)               | 2 (33.3)     | 6 (100)               | 0 (0)        | 5<br>(100)                              | 0 (0)       | 4 (80)                                  | 1 (20)       | 5 (100)                 | 0 (0)       | 5<br>(100)                    | 0 (0)       | 6<br>(100)                    | 0 (0)       | 4 (80)                        | 1 (20)       |
| <b>Experience Working with suicidal persons</b> |                        |              |                       |              |                                         |             |                                         |              |                         |             |                               |             |                               |             |                               |              |
| < 7 years                                       | 7 (36.8)               | 12<br>(63.2) | 10<br>(55.6)          | 8 (44.4)     | 17<br>(94.4)                            | 1 (5.6)     | 14<br>(77.8)                            | 4<br>(22.2)  | 16<br>(88.9)            | 2<br>(11.1) | 17<br>(94.4)                  | 1 (5.6)     | 18<br>(94.7)                  | 1 (5.3)     | 14<br>(77.8)                  | 4<br>(22.2)  |

<sup>1</sup> None of the chi-square analyses examining differences in clinician responses for any of the items were found for any of the demographic or work characteristics.

|                               |               |               |              |               |              |             |              |              |              |             |              |             |              |             |              |             |
|-------------------------------|---------------|---------------|--------------|---------------|--------------|-------------|--------------|--------------|--------------|-------------|--------------|-------------|--------------|-------------|--------------|-------------|
| ≥7+ years                     | 10<br>(45.5)  | 12<br>(54.5)  | 11<br>(57.9) | 8 (42.1)      | 16<br>(72.7) | 6<br>(27.3) | 15<br>(68.2) | 7<br>(31.8)  | 20<br>(90.9) | 2 (9.1)     | 15<br>(75)   | 5 (25)      | 14<br>(73.7) | 5<br>(26.3) | 12<br>(63.2) | 7<br>(36.8) |
| <b>Type of Training</b>       |               |               |              |               |              |             |              |              |              |             |              |             |              |             |              |             |
| STARS trained                 | 7 (58.3)      | 5 (41.7)      | 7 (58.3)     | 5 (41.7)      | 8<br>(66.7)  | 4<br>(33.3) | 8<br>(66.7)  | 4<br>(33.2)  | 9 (75)       | 3 (25)      | 10<br>(90.9) | 1 (9.1)     | 9<br>(81.8)  | 2<br>(18.2) | 9<br>(81.8)  | 2<br>(18.2) |
| Not STARS trained             | 10<br>(34.5)  | 19<br>(65.5)  | 14 (56)      | 11 (44)       | 25<br>(89.3) | 3<br>(10.7) | 21<br>(75)   | 7 (25)       | 27<br>(96.4) | 1 (3.6)     | 22<br>(81.5) | 5<br>(18.5) | 23<br>(85.2) | 4<br>(14.8) | 17<br>(65.4) | 9<br>(34.6) |
| <b>Recency of Training</b>    |               |               |              |               |              |             |              |              |              |             |              |             |              |             |              |             |
| <12 months                    | 10 (40)       | 15 (60)       | 9<br>(40.91) | 13<br>(59.09) | 18<br>(72)   | 7 (28)      | (16)<br>64   | (9) 36       | 21 (84)      | 4 (16)      | 19<br>(79.2) | 5<br>(20.8) | 18<br>(78.3) | 5<br>(21.7) | 14<br>(63.6) | 8<br>(36.4) |
| ≥12 months                    | 7<br>(43.75)  | 9<br>(56.25)  | 12 (80)      | 3 (20)        | 15<br>(100)  | 0 (0)       | (13)<br>86.7 | (2)<br>13.3  | 15 (100)     | 0 (0)       | 13<br>(92.9) | 1 (7.1)     | 14<br>(93.3) | 1 (6.7)     | 12<br>(80)   | 3 (20)      |
| <b>Recency of Supervision</b> |               |               |              |               |              |             |              |              |              |             |              |             |              |             |              |             |
| <12 months                    | 13<br>(40.63) | 19<br>(59.38) | 15<br>(51.7) | 14<br>(48.3)  | 25<br>(78.1) | 7<br>(21.9) | (21)<br>65.6 | (11)<br>34.4 | 28<br>(87.5) | 4<br>(12.5) | 24<br>(80)   | 6 (20)      | 23<br>(79.3) | 6<br>(20.7) | 22<br>(75.9) | 7<br>(24.1) |
| ≥12 months                    | 4<br>(44.44)  | 5<br>(55.55)  | 6 (75)       | 2 (25)        | 8<br>(100)   | 0 (0)       | (8)<br>100   | (0) 0        | 8 (100)      | 0 (0)       | 8<br>(100)   | 0 (0)       | 9<br>(100)   | 0 (0)       | 4 (50)       | 4 (50)      |
